# Supplementary material for: Occurrence and abundance of microplastics in surface water of Songkhla Lagoon
Source: PeerJ journal article supplement (doi:10.7717/peerj.17822), 2024-07-26

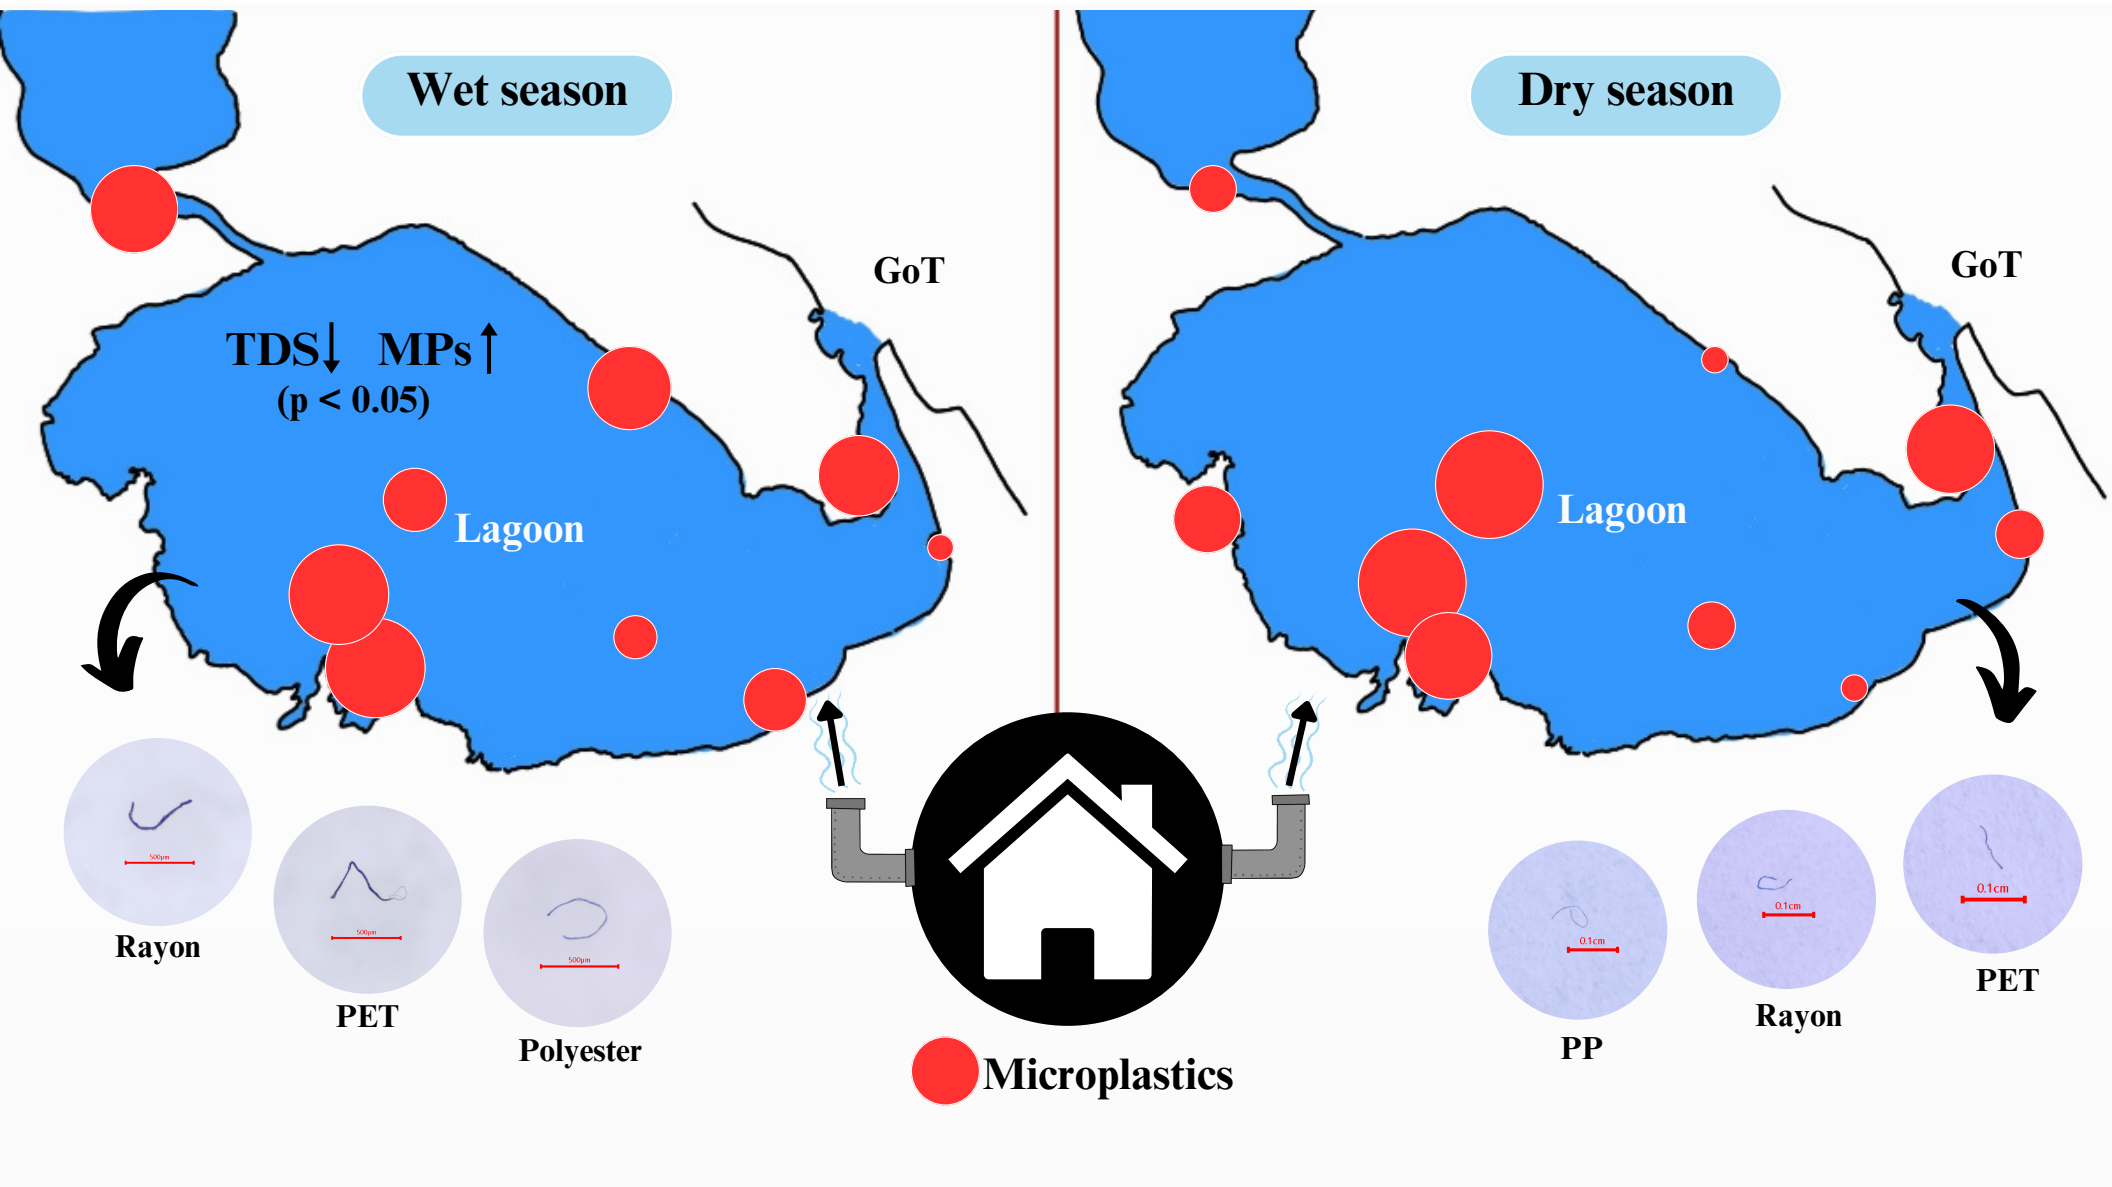

Supplement: Graphical_Abstract.pdf [file Graphical_Abstract.pdf]
