# Supplementary material for: Occurrence and abundance of microplastics in surface water of Songkhla Lagoon
Source: PeerJ. 2024 Jul 26;12:e17822. doi: 10.7717/peerj.17822 (PMC11285385; doi:10.7717/peerj.17822)
Supplement: Supplemental Information 2 [file peerj-12-17822-s002.xlsx]

## Sheet: Wet season
Micriplastic data
Station	Fiber	Fragment	<500 µm	500 µm - 1 mm	>1 mm	Black	Blue	Transparent	Other	item/51L	items/L
1	19	2	11	6	4	8	6	2	5	21	0.411765
2	16	3	5	9	5	1	5	4	9	19	0.372549
3	18	5	14	7	2	5	12	0	6	23	0.45098
4	17	3	11	5	4	8	5	2	5	20	0.392157
5	20	5	10	8	7	4	9	4	8	25	0.490196
6	12	5	9	4	4	6	8	2	1	17	0.333333
7	10	3	4	6	3	6	1	2	4	13	0.254902
8	9	6	7	6	2	2	7	3	3	15	0.294118
9	17	1	4	11	3	9	2	7	0	18	0.352941
10	43	3	13	22	11	20	8	16	2	46	0.901961

## Sheet: Dry season
Microplastic data
Station	Fiber	Fragment	<500 µm	500 µm - 1 mm	>1 mm	Blue	Transparent	Black	Other	MPs (items/51L)	MPs (items/L)
1	14	5	7	9	3	4	3	9	3	19	0.372549
2	11	7	11	7	0	6	2	4	6	18	0.352941
3	10	5	13	2	0	10	1	1	3	15	0.294118
4	10	3	8	4	1	6	0	3	4	13	0.254902
5	10	9	14	4	1	8	2	6	3	19	0.372549
6	5	6	7	2	2	7	0	1	3	11	0.215686
7	9	5	11	2	1	6	0	4	4	14	0.27451
8	8	7	10	3	2	7	0	3	5	15	0.294118
9	13	10	13	5	5	6	5	4	8	23	0.45098
10	17	7	14	5	5	11	5	4	4	24	0.470588
