# Supplementary material for: Occurrence and abundance of microplastics in surface water of Songkhla Lagoon
Source: PeerJ. 2024 Jul 26;12:e17822. doi: 10.7717/peerj.17822 (PMC11285385; doi:10.7717/peerj.17822)
Supplement: Supplemental Information 3 [file peerj-12-17822-s003.xlsx]

## Sheet: water quanlity wet_dry seasons
Wet season
Site	pH	Temperature (°C)	TDS (ppm)	Salinity (ppm)	DO (mg/l)	Conductivity (µS/cm)	Transparency (cm)
1	7.01	28.2	253.2	127.2	2.95	250.1	80
	6.93	28	255.8	127.8	2.86	251
	6.97	28.1	254.5	127.5	2.905	250.55
2	6.8	29	157.5	77.55	5.3	155.5	80
	6.5	28.5	150	75.81	5.25	148.2
	6.65	28.75	153.75	76.68	5.275	151.85
3	7.94	28.4	102.8	77.55	4.98	101	60
	7.82	27.3	104	75.81	4.4	100.7
	7.88	27.85	103.4	76.68	4.69	100.85
4	8.1	30.7	168.8	85.62	3.02	165.6	90
	7.95	29	171.2	87.12	3.13	175.4
	8.025	29.85	170	86.37	3.075	170.5
5	8.18	27.9	2.208	1027	3.67	2263	30
	8.06	28	2.177	1137	3.11	2280
	8.12	27.95	2.1925	1082	3.39	2271.5
6	8.07	28.3	271	133	5.95	268	50
	8.05	28.3	272.9	133.7	5.97	269
	8.06	28.3	271.95	133.35	5.96	268.5
7	7.92	28.4	403.6	197.1	0.25	395.2	30
	7.73	28	403.6	200	0.18	396.9
	7.825	28.2	403.6	198.55	0.215	396.05
8	7.8	28.7	185.3	92.89	7.78	182.1	50
	7.78	28.6	185.2	94.2	7.58	183
	7.79	28.65	185.25	93.545	7.68	182.55
9	7.99	29.6	186.6	94.1	6.72	182.4	60
	7.97	29.6	186	94	6.7	183
	7.98	29.6	186.3	94.05	6.71	182.7
10	8.02	28.3	65.27	36.96	6.95	62.02	60
	8.01	28.3	65.3	36.9	6.9	62
	8.015	28.3	65.285	36.93	6.925	62.01
Dry season
Site	pH	Temperature (°C)	TDS (ppt)	Salinity (ppt)	DO (mg/l)	Conductivity (mS/cm)	Transparency (cm)
1	6.79	29.5	26.52	16.75	4.27	27.67	110
	6.89	28.8	26.58	16.47	3.96	27.69
	6.84	29.15	26.55	16.61	4.115	27.68
2	6.82	29.6	10.36	6.14	8.57	10.74	80
	6.27	29.1	6.414	3.56	6.66	6.716
	6.545	29.35	8.387	4.85	7.615	8.728
3	7.01	28.8	15.79	9.468	8.08	16.45	160
	6.79	28.7	16.63	10.29	8.44	17.4
	6.9	28.75	16.21	9.879	8.26	16.925
4	7.63	29.1	43.6	29.05	6.85	45.47	80
	7.63	29.9	43.61	29.05	7	45.44
	7.63	29.5	43.605	29.05	6.925	45.455
5	7.61	28.9	44.45	29.11	6.88	46.32	90
	7.41	29	44.42	29.16	7.28	46.26
	7.51	28.95	44.435	29.135	7.08	46.29
6	7.81	28.8	40.65	26.43	8.26	42.37	150
	7.8	28.8	40.6	26.4	8.2	42.3
	7.805	28.8	40.625	26.415	8.23	42.335
7	7.59	28.8	39.13	25.66	0	41.21	30
	7.28	28.5	40.74	26.75	0	43.03
	7.435	28.65	39.935	26.205	0	42.12
8	7.95	28.8	27.7	18.89	7.91	30.95	180
	7.9	28.8	27	18.8	7.9	30.9
	7.925	28.8	27.35	18.845	7.905	30.925
9	8.04	27.9	14.78	13.5	9.27	15.5	200
	8	27.9	14.2	13.5	9.2	15
	8.02	27.9	14.49	13.5	9.235	15.25
10	8.24	28.2	12.59	7.167	8.62	14.54	170
	8.1	28.2	12.3	7.1	8.6	14.1
	8.17	28.2	12.445	7.1335	8.61	14.32

## Sheet: correlation
	pH	Temperature	TDS	Salinity	DO	Conductivity	Transparency	MPs
Wet season
pH	1	-0.0547115	-0.291795	0.283999	0.0545455	0.272727	-0.322057	0.309091
Temperature		1	0.158537	-0.306538	0.346506	-0.25532	0.456601	-0.364743
TDS			1	0.427296	-0.249241	0.44985	-0.133564	-.821**
Salinity				1	-0.549477	.982**	-0.558362	-0.321043
DO					1	-0.442424	-0.0681275	-0.00606061
Conductivity						1	-0.613147	-0.381818
Transparency							1	0.297283
MPs								1
	10	10	10	10	10	10	10	10
Dry season
pH	1	-0.571431	0.0424242	0.115152	0.6	0.0424242	.657*	0.213419
Temperature		1	0.334348	0.297874	-0.595747	0.334348	-0.579268	-0.363916
TDS			1	.988**	-0.50303	1.000**	-0.358664	-0.548791
Salinity				1	-0.478788	.988**	-0.32219	-0.493912
DO					1	-0.50303	.833**	0.384153
Conductivity						1	-0.358664	-0.548791
Transparency							1	0.440369
MPs								1
	10	10	10	10	10	10	10	10

## Sheet: site location
site	Latitude	Longitude
1	7°09′ 23.18″	100°27′ 59.69″
2	7°11′ 12.13″	100°24′ 47.81″
3	7°15′ 38.94″	100°24′ 51.51″
4	7°13′ 17.23″	100°31′ 33.27″
5	7°13′ 17.23″	100°31′ 33.34″
6	7°08′ 55.06″	100°33′ 24.03″
7	7°10′ 57.53″	100°35′ 37.43″
8	7°09′ 44.79″	100°31′ 31.16″
9	7°11′ 38.41″	100°28′ 32.59″
10	7°10′ 19.82″	100°27′ 31.19″
